# Supplementary material
Source: PubMed Central journal article supplement (PMC4155044)
Supplement: supp_WNL.0000000000000730_778.pdf [file supp_WNL.0000000000000730_778.pdf]

# Expanding antiplatelet use for patients with stroke

## The case for stroke of unknown type

Amanda G. Thrift, PhD  
Felipe de los Rios, MD

Correspondence to  
Dr. Thrift:  
amanda.thrift@monash.edu

*Neurology*® 2014;83:778–779

Stroke occurs in approximately 16.9 million people worldwide annually.<sup>1</sup> It is the second cause of death<sup>2</sup> and the third leading cause of disability-adjusted life-years lost to disease.<sup>3</sup> The greatest burden is in low and middle income countries (LMIC), where approximately 69% of these strokes occur.<sup>1</sup>

Aspirin is of benefit in reducing in-hospital death and recurrence in patients with suspected ischemic stroke.<sup>4</sup> However, it is unclear whether aspirin treatment could also be beneficial in people with stroke of undetermined type, mostly due to concerns regarding bleeding risks in patients who may have intracerebral hemorrhage (ICH) or subarachnoid hemorrhage (SAH). This is important to understand as in many regions of LMIC brain imaging is either not available or unaffordable, and so large proportions of people have strokes of unknown type. For example, in the Trivandrum Stroke Registry, 31.2% of patients were not imaged, more of these being in the rural population (43.6%) than the urban population (28.1%).<sup>5</sup> Similarly, in a prospective CT scan study of patients with acute stroke in Nigeria, only 101 patients out of 1,122 (9%) could afford the CT scan.<sup>6</sup> Finding ways to prevent mortality, stroke recurrence, and disability in these nonimaged patients would be of great benefit, particularly in regions where resources are scant and social welfare safety nets are usually inadequate or nonexistent.<sup>7</sup>

In the current issue of *Neurology*®, Berkowitz et al.<sup>8</sup> carry out a decision analysis to assess the effects of aspirin therapy on the risk of in-hospital stroke recurrence and death among patients with acute stroke who do not undergo brain imaging. They used data from a meta-analysis of 2 large clinical trials of early initiation of aspirin therapy following stroke.<sup>4</sup> These data were useful because aspirin therapy was not only provided to patients following an ischemic stroke, but was also inadvertently provided to 733 patients with ICH. This enabled assessment of the effects of aspirin therapy in people with both ischemic stroke and ICH. Since the proportion of people with ICH is unknown in many

populations, the authors undertook sensitivity analyses of in-hospital stroke recurrences and death in patient groups where the proportion of ICH ranged from 9% up to 60%. When the proportion of strokes that were ICH was 34%, the authors found that aspirin use would be likely to reduce in-hospital mortality or stroke recurrence by 13 per 1,000. This means that only 77 patients would need to be treated for one to benefit. Furthermore, aspirin was beneficial even when the proportion of strokes that were ICH was as high as 60%, a value that is likely higher than what is expected for most populations. Based on this analysis and similar previous observations,<sup>9</sup> it seems reasonable to recommend that acute stroke patients of unknown type receive aspirin therapy (160 mg/day to 320 mg/day) at least 25–48 hours after onset of symptoms and during their hospitalization for a period of up to 4 weeks. As the bleeding risk in ICH is highest during the first 24 hours, administering aspirin within this period is not recommended. This finding is highly important for clinicians who work in low-resource settings where imaging is either unavailable or unaffordable to patients, but is also relevant to clinicians in other settings. However, as the authors recommend, it seems prudent to exclude from aspirin therapy those patients whose clinical presentation suggests ICH or SAH. This includes those presenting with any of the following: sudden-onset headache, seizures, coma, neck stiffness, vomiting, or diastolic blood pressure greater than 110 mm Hg.<sup>10</sup>

How does this translate to benefits in LMIC? Using data from the Global Burden of Disease (2010) study, approximately 11.6 million strokes occur in LMIC annually.<sup>1</sup> If we estimate that 20% (2.32 million) of these patients are not imaged and apply the prediction that aspirin use in these patients would avert 13 deaths or second strokes per 1,000 patients treated, over 30,000 patients would be expected to have improved in-hospital outcomes every year. Given that the proportion of patients not imaged is likely to be greater than 20%, the

See page 787

From the Department of Medicine (A.G.T.), Southern Clinical School, Monash Medical Centre, Monash University; Florey Institute of Neuroscience and Mental Health (A.G.T.), Melbourne, Australia; Stroke & Cerebrovascular Diseases (F.d.l.R.), SANNA–Healthcare Network, Lima, Peru; and the Department of Neurology and Rehabilitation Medicine (F.d.l.R.), University of Cincinnati, OH.

Go to [Neurology.org](http://Neurology.org) for full disclosures. Funding information and disclosures deemed relevant by the authors, if any, are provided at the end of the editorial.

potential effect of administering aspirin in these patients is likely to be even better.

What remains unknown is whether this translates into improved long-term outcomes, as the analysis was limited to in-hospital mortality and recurrence. Furthermore, it remains unclear whether these patients should be discharged on antiplatelet agents. Despite these limitations, the use of aspirin in those with unknown stroke subtype who lack signs or symptoms suggestive of ICH or SAH is an important message for those regions where imaging is less available. Further decision analysis based on the findings of studies with long-term outcomes and aspirin use would substantially add to our knowledge of how to manage patients who do not have access to imaging.

### AUTHOR CONTRIBUTIONS

Amanda G. Thrift: drafting/revising the manuscript, analysis or interpretation of data. Felipe de los Rios la Rosa: drafting/revising the manuscript.

### STUDY FUNDING

A.G.T. is supported by a research fellowship from the NHMRC (1042600).

### DISCLOSURE

Dr. Thrift receives funding from the National Health & Medical Research Council (NHMRC) via project grants (491109, 586605, 1005740, 1040030, 1041401) and a research fellowship (1042600); receives honoraria for serving on the Research Committee of the NHMRC; and serves on the editorial boards of *Stroke*, *International Journal of Stroke*, and *Neuroepidemiology*. Dr. de los Rios serves on the advisory board of Boehringer Ingelheim. Go to Neurology.org for full disclosures.

### REFERENCES

1. Feigin VL, Forouzanfar MH, Krishnamurthi R, et al. Global and regional burden of stroke during 1990–2010: findings

from the Global Burden of Disease Study 2010. *Lancet* 2014;383:245–254.

2. Lozano R, Naghavi M, Foreman K, et al. Global and regional mortality from 235 causes of death for 20 age groups in 1990 and 2010: a systematic analysis for the Global Burden of Disease Study 2010. *Lancet* 2012;380:2095–2128.
3. Murray CJ, Vos T, Lozano R, et al. Disability-adjusted life years (DALYs) for 291 diseases and injuries in 21 regions, 1990–2010: a systematic analysis for the Global Burden of Disease Study 2010. *Lancet* 2012;380:2197–2223.
4. Chen Z, Sandercock P, Pan H, et al; on behalf of the CAST and IST collaborative groups. Indications for early aspirin use in acute ischemic stroke: a combined analysis of 40,000 randomized patients from the Chinese Acute Stroke Trial and the International Stroke Trial. *Stroke* 2000;31:1240–1249.
5. Sridharan SE, Unnikrishnan JP, Sukumaran S, et al. Incidence, types, risk factors, and outcome of stroke in a developing country: the Trivandrum Stroke Registry. *Stroke* 2009;40:1212–1218.
6. Kolapo KO, Ogun SA, Danesi MA, Osalusi BS, Odusote KA. Validation study of the Siriraj Stroke Score in African Nigerians and evaluation of the discriminant values of its parameters: a preliminary prospective CT scan study. *Stroke* 2006;37:1997–2000.
7. Lloyd-Sherlock P. Stroke in developing countries: epidemiology, impact and policy implications. *Development Policy Rev* 2010;28:693–709.
8. Berkowitz AL, Westover MB, Bianchi MT, Chou SHY. Aspirin for acute stroke of unknown etiology in resource-limited settings: a decision analysis. *Neurology* 2014;83:787–793.
9. Garbusinski JM, van der Sande MA, Bartholome EJ, et al. Stroke presentation and outcome in developing countries: a prospective study in the Gambia. *Stroke* 2005;36:1388–1393.
10. Runchey S, McGee S. Does this patient have a hemorrhagic stroke? Clinical findings distinguishing hemorrhagic stroke from ischemic stroke. *JAMA* 2010;303:2280–2286.
